# Supplementary material
Source: Elsevier journal article supplement (https://comptes-rendus.academie-sciences.fr/chimie/article/10.1016/j.crci.2017.10.001/file/attach/mmc1.pdf)
Supplement: mmc1 [file mmc1.pdf]

## Supplementary Information

### 1. Recovery and reuse studies.

The solid was separated by decantation (after centrifugation), being washed with isopropanol (6 x 2 ml). The resulting solid was dried under vacuum for 5 hours. Before the reuse, the solid was calcined at 400°C under air (heating rate: 5°C/min) for 3h 30 min.

**Table S1** Catalytic results on the carboesterification reaction of styrene with acetic anhydride using Cu(1.)/OMS2 (first use and reuse).

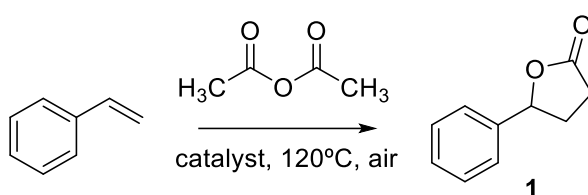

| Entry <sup>a</sup> | Catalyst                | Additive | Mn (equiv) | Cu (mol%) | C (%) <sup>b</sup> | S (%) <sup>c</sup> | Y (%) <sup>d</sup> | MB (%) <sup>e</sup> |
|--------------------|-------------------------|----------|------------|-----------|--------------------|--------------------|--------------------|---------------------|
| 1 <sup>f</sup>     | Cu(1)/OMS2<br>first use | LiBr     | 0.6        | 1         | 61                 | 55                 | 34                 | 80                  |
| 2                  | Cu(1)/OMS2<br>reuse     | LiBr     | 0.6        | 1         | 53                 | 52                 | 28                 | 82                  |

a) Reaction conditions: styrene (0.25 mmol), LiBr (0.05 mmol), NaOAc (0.25 mmol), 1 ml (Ac<sub>2</sub>O), n-dodecane (external standard); b) conversion (%) was obtained by GC on the bases of styrene converted; c) selectivity (%) was obtained by GC on the bases of styrene converted; d) yield (%) was obtained by GC on the bases of styrene converted; e) MB (%) = mass balance (%) calculated by GC (the integrated peak areas of starting reagents and products were corrected for their respective response factors, whereas the amount of unreacted starting material was not included in the mass balance); f) results included in entry 10, Table 1.

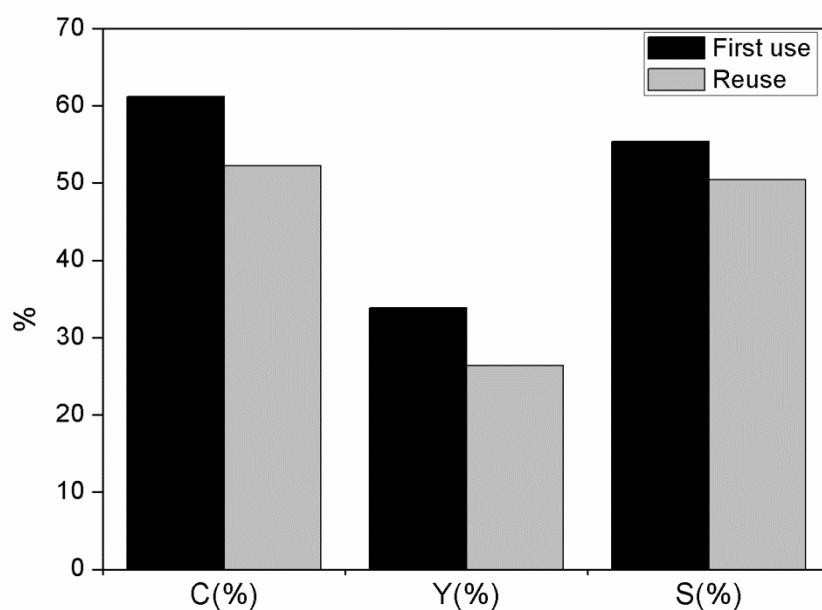

**Figure S1.** Graphic representation of the catalytic activity of fresh and used Cu(1%)/OMS2 catalyst (C(%): conversion(%); Y(%): yield(%) and S(%): selectivity (%)).

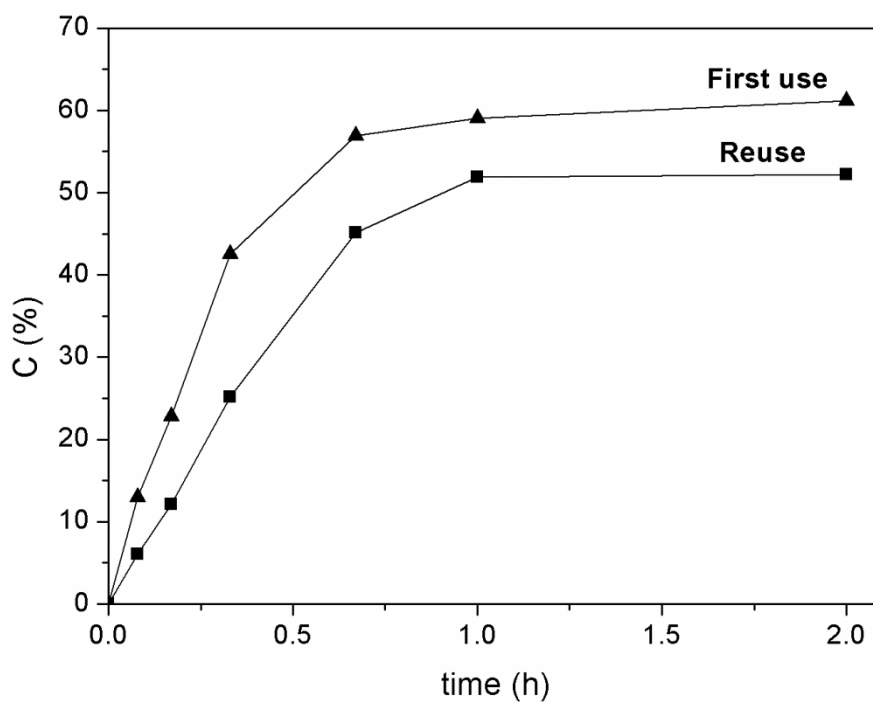

**Figure S2.** Evolution of the conversion(%) of styrene with time in the presence of Cu(1%)/OMS-2 as catalyst after first use ( $\blacktriangle$ ) and reuse ( $\blacksquare$ ).
